# Supplementary material for: Satisfaction Level of Tuberculosis Patients Regarding Their Access to TB Care and Prevention Services, Delivered Through a Public–Private Mix Model in Pakistan
Source: MDPI journal article supplement (doi:10.3390/healthcare7040119), 2019-10-18
Supplement: s1 [file s1]

# End of Project Evaluation – New Funding Model

## Patient Satisfaction Survey

Domains: (1) Perspective on Quality of Care, (2) Access to Information, (3) Access to Services, (4) Responsiveness, (5) Affordability of Services, (6) Case Management

### **Sub-Study 3:**

Understanding patient's perspective and experience to appraise the access to healthcare services

|                  |                                    |                                         |                        |
|------------------|------------------------------------|-----------------------------------------|------------------------|
| Date             |                                    | District                                |                        |
| Patient Name     |                                    | Gender                                  | 1. Male<br>2. Female   |
| Age              |                                    | Education in years<br>(completed years) |                        |
| Occupation       |                                    | Contact Number                          |                        |
| Disease site     | 1. Pulmonary<br>2. Extra Pulmonary | Treatment category                      | 1. Cat -1<br>2. Cat -2 |
| Interviewer Name |                                    |                                         |                        |

| Accessibility (Service and information) Measurement Scale |                                                                                                                                                                                                                                                                                                                                                                                                                    |                                                                                                 |
|-----------------------------------------------------------|--------------------------------------------------------------------------------------------------------------------------------------------------------------------------------------------------------------------------------------------------------------------------------------------------------------------------------------------------------------------------------------------------------------------|-------------------------------------------------------------------------------------------------|
| 1.                                                        | Please tell us about your education and occupation?                                                                                                                                                                                                                                                                                                                                                                |                                                                                                 |
| 2.                                                        | Usually where do you and your family go for treatment?                                                                                                                                                                                                                                                                                                                                                             | 1. Government Hospital<br>2. Private clinic/hospital<br>3. Other (traditional healers, hakeem,) |
| 3.                                                        | Reason for Preference (Multiple selection is allowed)<br>1. Saves time (waiting time)<br>2. Saves money<br>3. Staff is more competent<br>4. Is close to the residence<br>5. Trust on the healthcare provider<br>6. Good relationship with healthcare provider or any of the staff members<br>7. Provider has a good behavior (polite etc)<br>8. Provider gives adequate time for consultation or medical attention |                                                                                                 |
| 4.                                                        | If you prefer a private doctor/clinic, why did you select this private healthcare facility (Multiple selection is allowed)<br>1. Someone referred you                                                                                                                                                                                                                                                              |                                                                                                 |

|                                                                                                             |                                                                                                                                                                                                            |                                                                                                                           |
|-------------------------------------------------------------------------------------------------------------|------------------------------------------------------------------------------------------------------------------------------------------------------------------------------------------------------------|---------------------------------------------------------------------------------------------------------------------------|
|                                                                                                             | 2. You were referred from a chest camp<br>3. Because of free TB treatment<br>4. Doctor's good reputation<br>5. Past treatment experience<br>6. Good behaviour of doctor<br>7. Other (please describe)_____ |                                                                                                                           |
| 5.                                                                                                          | Is this doctor/clinic the closest doctor/clinic from your house?                                                                                                                                           | 1. Yes<br>2. No<br>3. May be                                                                                              |
| 6.                                                                                                          | Which level of provider you would prefer to see first?                                                                                                                                                     | 1. Traditional practitioners (Hakeem, Homeo etc)<br>2. Mid-level Providers (dispenser, LHV, Health Tech)<br>3. Doctor/GPs |
| <b>Note: Please select one number from given range, where 1 is the best/always and 5 is the worst/never</b> |                                                                                                                                                                                                            |                                                                                                                           |
| 7.                                                                                                          | The paramedic (clinic staff) was available whenever you needed him (Babikako 2011)                                                                                                                         | ① ② ③ ④ ⑤                                                                                                                 |
| 8.                                                                                                          | The doctor spent enough time consulting and diagnosing TB?                                                                                                                                                 | ① ② ③ ④ ⑤                                                                                                                 |
| 9.                                                                                                          | Were you informed about the duration for which you will need to continue taking anti-TB drugs? Mention period?                                                                                             | 1. Yes _____<br>2. No<br>99. Don't Know                                                                                   |
| 10.                                                                                                         | Were you informed about the significance of taking regular medicine?                                                                                                                                       | 1. Yes<br>2. No<br>99. Don't Know                                                                                         |
| 11.                                                                                                         | Were you informed if taking medicine would have unwanted effects or side effects? (Babikako 2011)                                                                                                          | 1. Yes<br>2. No<br>99. Don't Know                                                                                         |
| 12.                                                                                                         | Were you informed about what should you do if you experience any unwanted side effects? (Babikako 2011)                                                                                                    | 1. Yes<br>2. No<br>99. Don't Know                                                                                         |
| 13.                                                                                                         | How long did you wait for getting results of lab tests?                                                                                                                                                    | 1. <15 minutes<br>2. 16-30 minutes<br>3. 31-45 minutes<br>4. >45 minutes                                                  |
| 14.                                                                                                         | How long did you have to wait for receiving treatment from GP? (waiting time)                                                                                                                              | 1. <15 minutes<br>2. 16-30 minutes<br>3. 31-45 minutes<br>4. >45 minutes                                                  |
| 15.                                                                                                         | How long did you have to wait for collecting medicine?                                                                                                                                                     | 1. <15 minutes<br>2. 16-30 minutes<br>3. 31-45 minutes<br>4. >45 minutes                                                  |
| 16.                                                                                                         | Do/did you allow anyone to contact you or visit your home for reminder or other support?                                                                                                                   | 1. Yes<br>2. No<br>99. Don't Know                                                                                         |
| 17.                                                                                                         | During your treatment, did someone contact you for reminder, sharing treatment related information? Please explain (who? how many times? for what purpose)                                                 |                                                                                                                           |

|                                                                                                |                                                                                                                                                                   |                                                                                    |
|------------------------------------------------------------------------------------------------|-------------------------------------------------------------------------------------------------------------------------------------------------------------------|------------------------------------------------------------------------------------|
|                                                                                                |                                                                                                                                                                   |                                                                                    |
| 18.                                                                                            | Did the provider give you information about how spread of TB can be prevented?                                                                                    | 1. Yes<br>2. No<br>99. Don't Know                                                  |
| 19.                                                                                            | Before you got diagnosed, were you aware about TB disease, its symptoms, prevention and treatment?                                                                | 1. Yes<br>2. No<br>99. Don't Know                                                  |
| <b>Affordability Measurement Scale</b>                                                         |                                                                                                                                                                   |                                                                                    |
| 20.                                                                                            | Who is responsible for your TB related treatment related expenses?                                                                                                | 1. Yourself<br>2. Father<br>3. Husband<br>4. Brother<br>5. Other: _____            |
| 21.                                                                                            | How much did you spend on treatment (consultation, labs and drugs) before you were diagnosed for TB?                                                              | Amount _____                                                                       |
| 22.                                                                                            | How much have you spent on treatment (consultation, labs and drugs) after being diagnosed for TB?                                                                 |                                                                                    |
| 23.                                                                                            | After you were diagnosed with TB, did you pay for the following services? If yes, please mention amount                                                           | 1. TB medicine (Rs____)<br>2. Doctor consultation (Rs____)<br>3. Lab test (Rs____) |
| 24.                                                                                            | Generally, how much cost have you incurred in visiting this clinic for TB treatment? (round trip )                                                                | Amount _____                                                                       |
| 25.                                                                                            | During treatment, did you face any livelihood challenge (e.g., off-days, job termination, salary deduction, effect on daily wage), if yes probe about the detail. |                                                                                    |
| 26.                                                                                            | What is your opinion about the cost of TB treatment?                                                                                                              |                                                                                    |
| <b>Acceptability Measurement Scale</b>                                                         |                                                                                                                                                                   |                                                                                    |
| Note: Please select one number from given range, 1 be the best/always and 5 be the worst/never |                                                                                                                                                                   |                                                                                    |
| 27.                                                                                            | Doctor listened to me fully, whenever I had any complaint                                                                                                         | ① ② ③ ④ ⑤                                                                          |
| 28.                                                                                            | The paramedic was respectful towards me                                                                                                                           | ① ② ③ ④ ⑤                                                                          |
| 29.                                                                                            | The doctor was respectful to me                                                                                                                                   | ① ② ③ ④ ⑤                                                                          |
| 30.                                                                                            | How satisfied are you with the overall care and services received at this clinic? (Babikako 2011)                                                                 | ① ② ③ ④ ⑤                                                                          |
| 31.                                                                                            | How satisfied were you with amount of time the doctor(s) spent with you during clinic visit? (Babikako 2011)                                                      | ① ② ③ ④ ⑤                                                                          |

|     |                                                                                                                                            |                                        |
|-----|--------------------------------------------------------------------------------------------------------------------------------------------|----------------------------------------|
| 32. | Doctor or staff of other hospital/clinic (which you visited on previous occasion) treated you in efficient and better way? (Babikako 2011) | ① ② ③ ④ ⑤                              |
| 33. | How would you feel if your identity is disclosed as TB patient in community?                                                               | 1. Good<br>2. Bad<br>3. Doesn't matter |
| 34. | Would you recommend this clinic to somebody else for seeking healthcare? (Babikako 2011)                                                   | 1. Yes<br>2. No<br>3. May be           |
| 35. | If you had another illness again, would you choose the same clinic/doctor? (Babikako 2011)                                                 | 1. Yes<br>2. No<br>3. May be           |
| 36. | The results of the TB treatment will be as good as you expect? (Babikako 2011)                                                             | 1. Yes<br>2. No<br>3. May be           |
| 37. | Do you think your personal information is kept secure in clinic?                                                                           | 1. Yes<br>2. No<br>3. May be           |
| 38. | Did you receive drugs on time (at clinic) without being asked for wait of couple of days?                                                  | 1. Yes<br>2. No<br>3. May be           |
| 39. | Do you have any problem in sharing your contact details (contact number, home address)                                                     | 1. Yes<br>2. No<br>3. May be           |
| 40. | Before starting treatment, were you aware that medicine of TB are provided free of cost?                                                   | 1. Yes<br>2. No                        |
